# Supplementary material for: Acidic Stabilization of the Dual-Aromatic Heterocyclic Anions
Source: MDPI journal article supplement (doi:10.3390/catal11070766), 2021-06-24
Supplement: s1 [file s1]

## Supplementary information for

### Acidic stabilization of the dual-aromatic heterocyclic anions

*Chongyang Li,<sup>a,b</sup> Yongli Huang,<sup>a\*</sup> Chang Q Sun,<sup>c,d</sup> and Lei Zhang<sup>b,e\*</sup>*

*<sup>a</sup>Key Laboratory of Low-dimensional Materials and Application Technology (Ministry of Education), School of Materials Science and Engineering, Xiangtan University, Xiangtan 411105, China*

*<sup>b</sup>CAEP Software Center for High Performance Numerical Simulation, Beijing, 100088, China*

*<sup>c</sup>EBEAM, Yangtze Normal University, Chongqing, 408100, China*

*<sup>d</sup>NOVITAS, Nanyang Technological University, 639798 Singapore*

*<sup>e</sup>Institute of Applied Physics and Computational Mathematics, Beijing, 100088, China*

*Corresponding authors: H.Y. ([huangyongli@xtu.edu.cn](mailto:huangyongli@xtu.edu.cn)) and L.Z. ([zhang\\_lei@iapcm.ac.cn](mailto:zhang_lei@iapcm.ac.cn))*

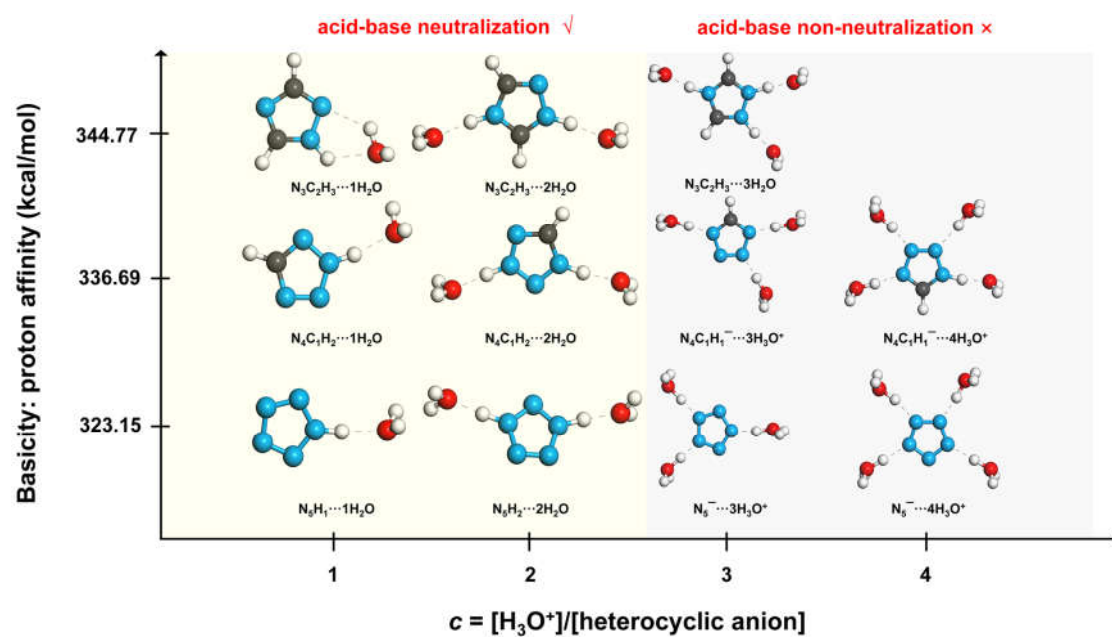

**Figure S1.** Reactivity of  $\text{N}_3\text{C}_2\text{H}_2^-$ ,  $\text{N}_4\text{C}_1\text{H}_1^-$ , and  $\text{N}_5^-$  with increasing concentration of  $\text{H}_3\text{O}^+$ .

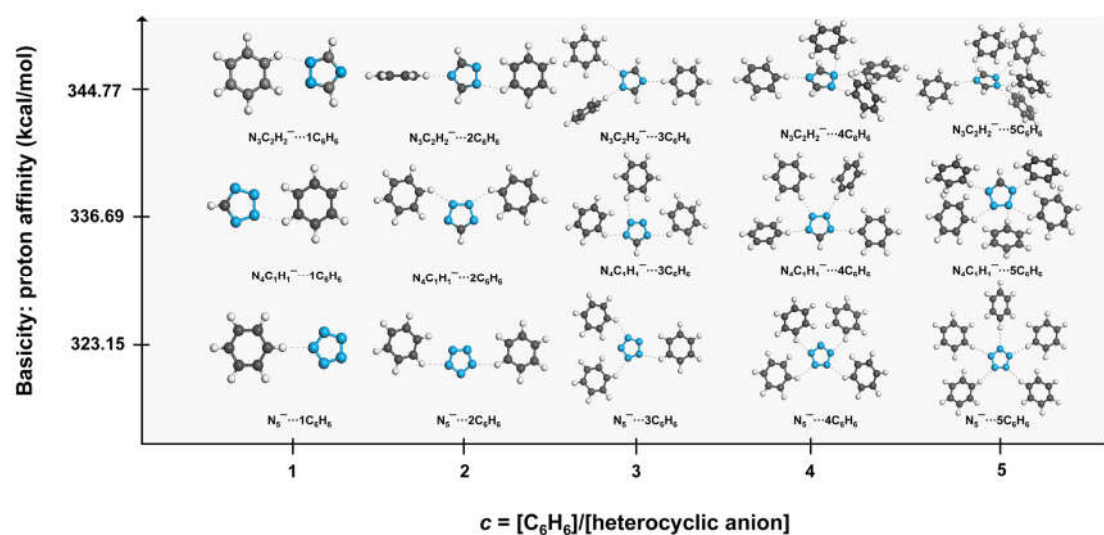

**Figure S2.** Reactivity of  $\text{N}_3\text{C}_2\text{H}_2^-$ ,  $\text{N}_4\text{C}_1\text{H}_1^-$ , and  $\text{N}_5^-$  with increasing concentration of benzene.

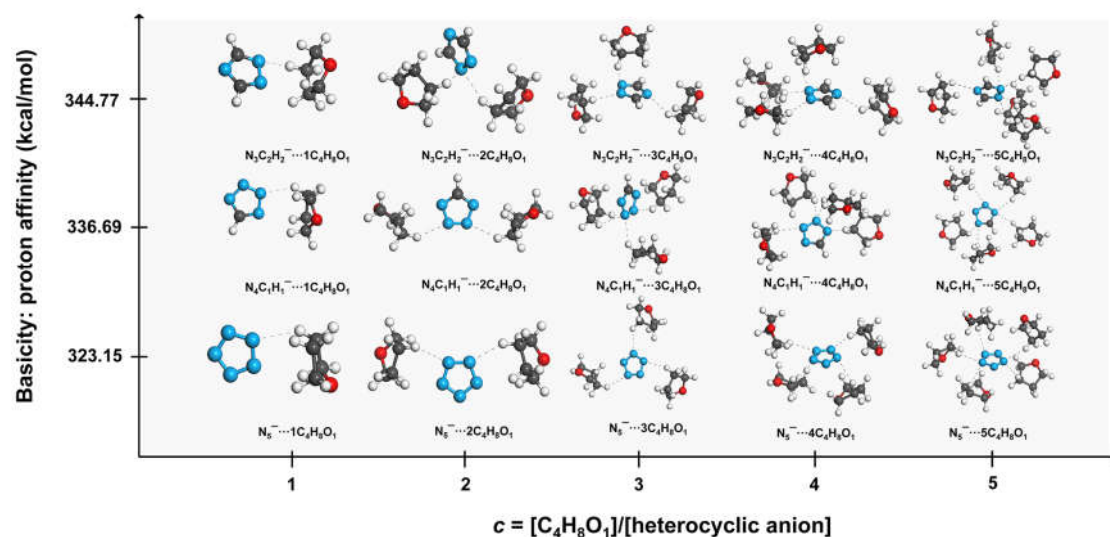

**Figure S3.** Reactivity of  $\text{N}_3\text{C}_2\text{H}_2^-$ ,  $\text{N}_4\text{C}_1\text{H}_1^-$ , and  $\text{N}_5^-$  with increasing concentration of THF.

|                                    |    |    |    |    |    |
|------------------------------------|----|----|----|----|----|
| $\text{N}_5^-$                     |    |    |    |    |    |
| $\text{MO}_{(\text{LP})}$          | 12 | 13 | 14 | 17 | 18 |
| $\text{N}_4\text{C}_1\text{H}_1^-$ |    |    |    |    |    |
| $\text{MO}_{(\text{LP})}$          | 13 | 14 | 16 | 17 |    |
| $\text{N}_3\text{C}_2\text{H}_2^-$ |    |    |    |    |    |
| $\text{MO}_{(\text{LP})}$          | 14 | 15 | 17 |    |    |

**Figure S4.** Isosurfaces (0.05) of  $\sigma$  MO containing nitrogen lone pairs ( $\text{MO}_{\text{min-}\sigma(\text{LP})}$ ) of  $\text{N}_3\text{C}_2\text{H}_2^-$ ,  $\text{N}_4\text{C}_1\text{H}_1^-$ , and  $\text{N}_5^-$ . The number under each isosurface is the corresponding MO index.

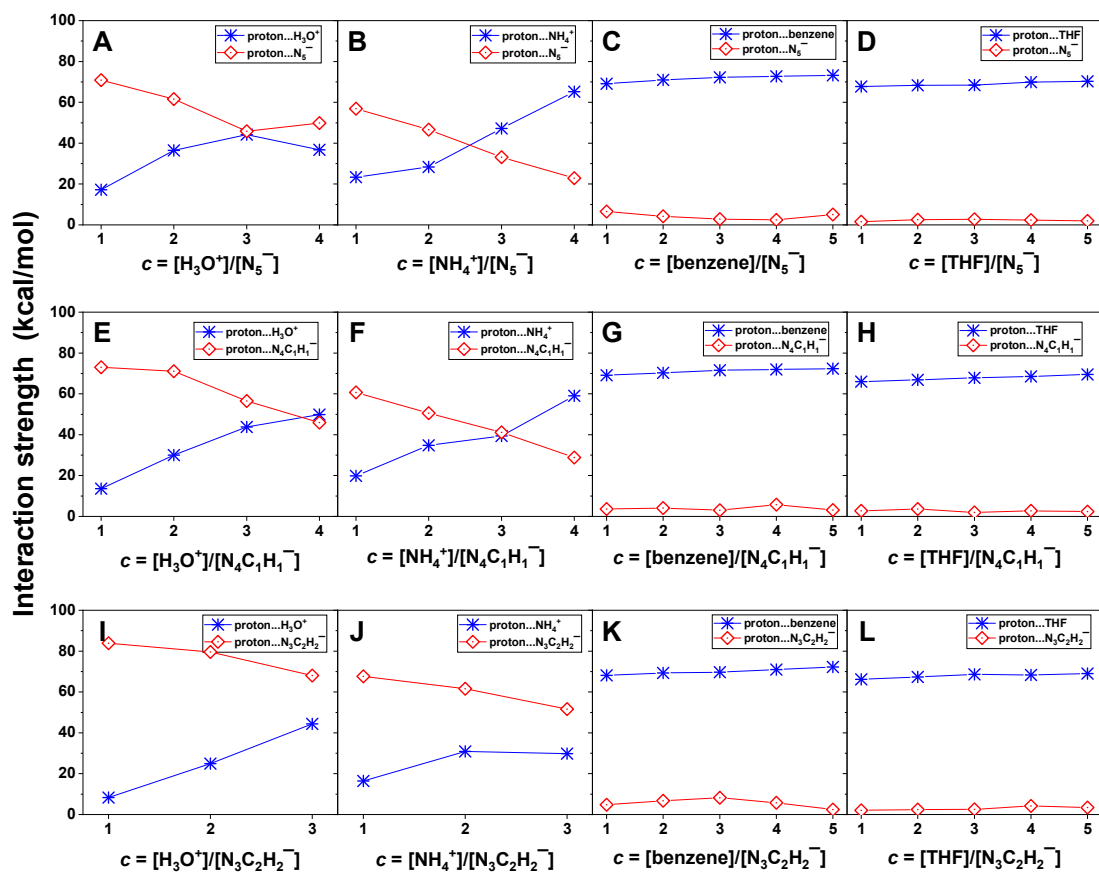

Figure S5. Interaction strengths of the proton with heterocyclic anions and with solvent species.

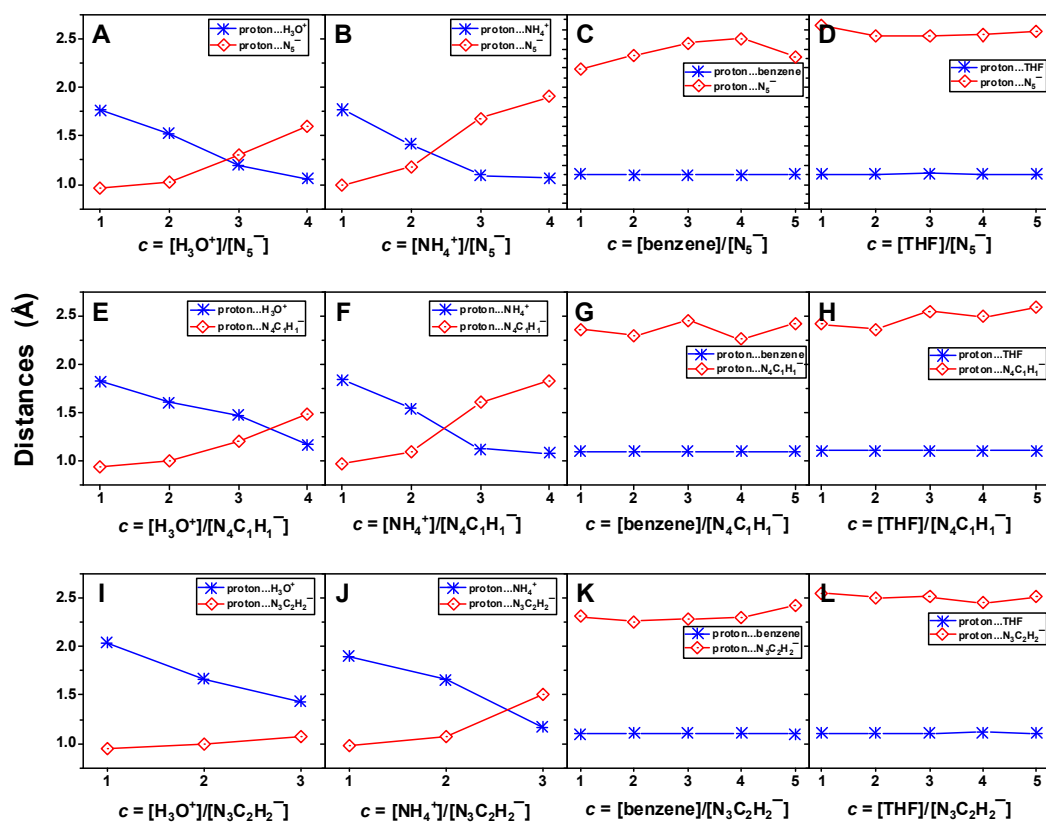

**Figure S6.** Distances of the proton from heterocyclic anions and from solvent species.

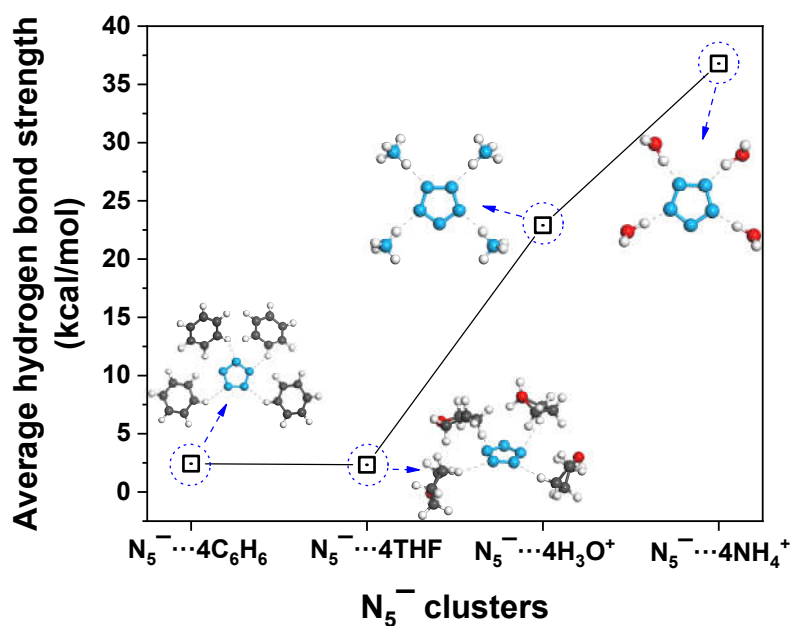

**Figure S7.** Comparison of strengths of the intermolecular hydrogen bonding in  $N_5^- \dots 4H_3O^+$ ,  $N_5^- \dots 4NH_4^+$ ,  $N_5^- \dots 4benzene$ , and  $N_5^- \dots 4THF$  complexes.

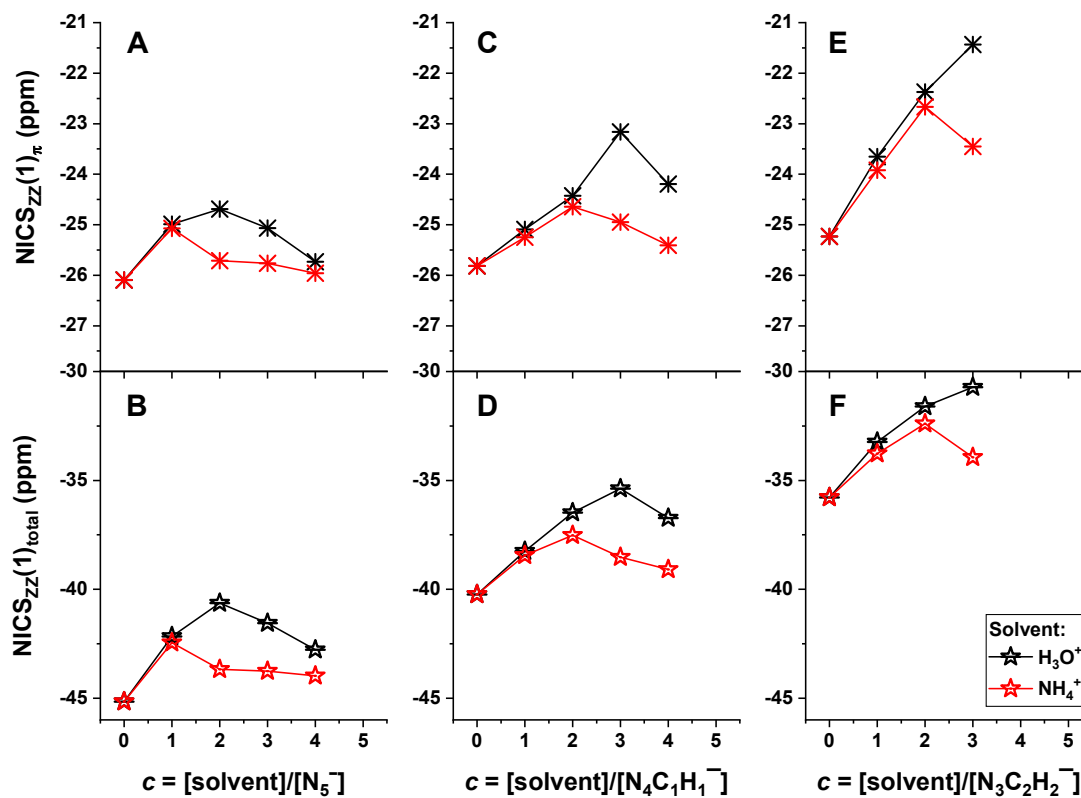

**Figure S8.**  $NICS_{zz}(1)_\pi$  and  $NICS_{zz}(1)_{total}$  of (A-B)  $N_5^-$ , (C-D)  $N_4C_1H_1^-$ , and (E-F)  $N_3C_2H_2^-$  with increasing concentration of  $H_3O^+$  and  $NH_4^+$ .

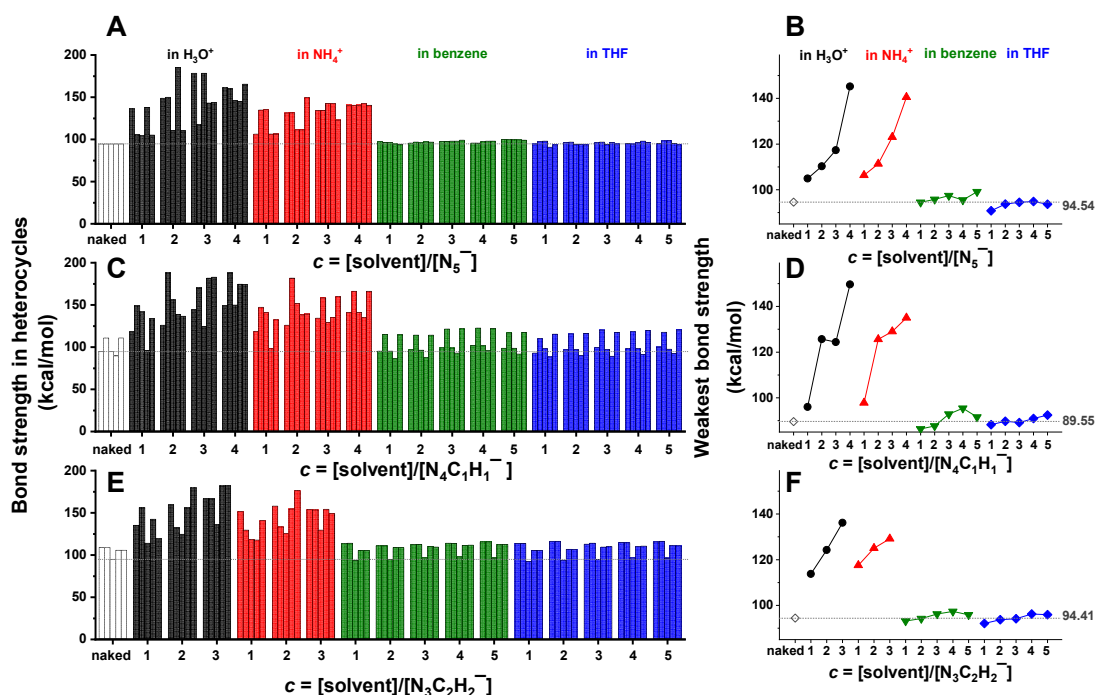

**Figure S9.** All bond strengths and weakest bond strengths in the rings of (A-B)  $N_5^-$ , (C-D)  $N_4C_1H_1^-$ , and (E-F)  $N_3C_2H_2^-$  in variant concentration of solvents. The weakest bond strength in the ring of each naked heterocyclic anion is marked by a dashed line for comparison.
